# Supplementary material for: Nociceptin Receptors Upregulated in Cocaine Use Disorder: A Positron Emission Tomography Imaging Study Using [11C]NOP-1A
Source: Atypon-hosted journal article supplement (doi:10.1176/appi.ajp.2019.18081007), 2019-05-06
Supplement: AJP_18081007_correction01.pdf [file AJP_18081007_correction01.pdf]

## **Corrections to Narendran et al.**

After the article “Nociceptin Receptors Upregulated in Cocaine Use Disorder: A Positron Emission Tomography Imaging Study Using [<sup>11</sup>C]NOP-1A,” by Rajesh Narendran, M.D., et al. (doi: 10.1176/appi.ajp.2019.18081007) was published online on May 6, 2019, and appeared in the June 2019 issue, the authors discovered an error in matching healthy control to cocaine use disorder subjects that led to data from one of the healthy control subjects being entered twice. Calculations were corrected to contrast 24 cocaine use disorder and 25 (i.e., not 26) healthy control subjects. The primary result and conclusions hold with the revised analyses. The article was reposted on July 18, 2019 with revisions to text, tables, figures, and statistical analyses to reflect the corrected healthy control group N of 25. There are some changes of note for secondary results: in Table 1, the between-group difference in education is not significant at  $p < 0.05$ ; in the linear mixed-model analysis of regional [<sup>11</sup>C]NOP-1A VT, the effect of diagnosis falls short of significance when tobacco use status is included as an additional factor; unpaired t tests comparing [<sup>11</sup>C]NOP-1A distribution volume were significant in four, not six, of the 11 regions of interest and the midbrain comparison did not survive the false discovery rate correction; the negative relationships between age and VT in the medial prefrontal cortex and dorso-lateral prefrontal cortex in the healthy control group do not reach significance.
